# Supplementary material for: Replicating the Hadley cell edge and subtropical jet latitude disconnect in idealized atmospheric models
Source: Copernicus journal article supplement (doi:10.5194/wcd-5-251-2024), 2024-02-20
Supplement: Supplementary file 1 [file wcd-5-251-2024-supplement.pdf]

Supplement of Weather Clim. Dynam., 5, 251–261, 2024  
<https://doi.org/10.5194/wcd-5-251-2024-supplement>  
© Author(s) 2024. CC BY 4.0 License.

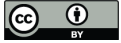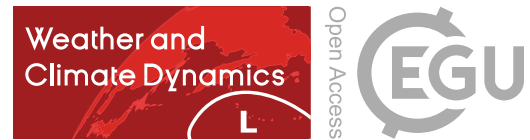

*Supplement of*

## **Replicating the Hadley cell edge and subtropical jet latitude disconnect in idealized atmospheric models**

**Molly E. Menzel et al.**

*Correspondence to:* Molly E. Menzel ([molly.menzel@nasa.gov](mailto:molly.menzel@nasa.gov))

The copyright of individual parts of the supplement might differ from the article licence.

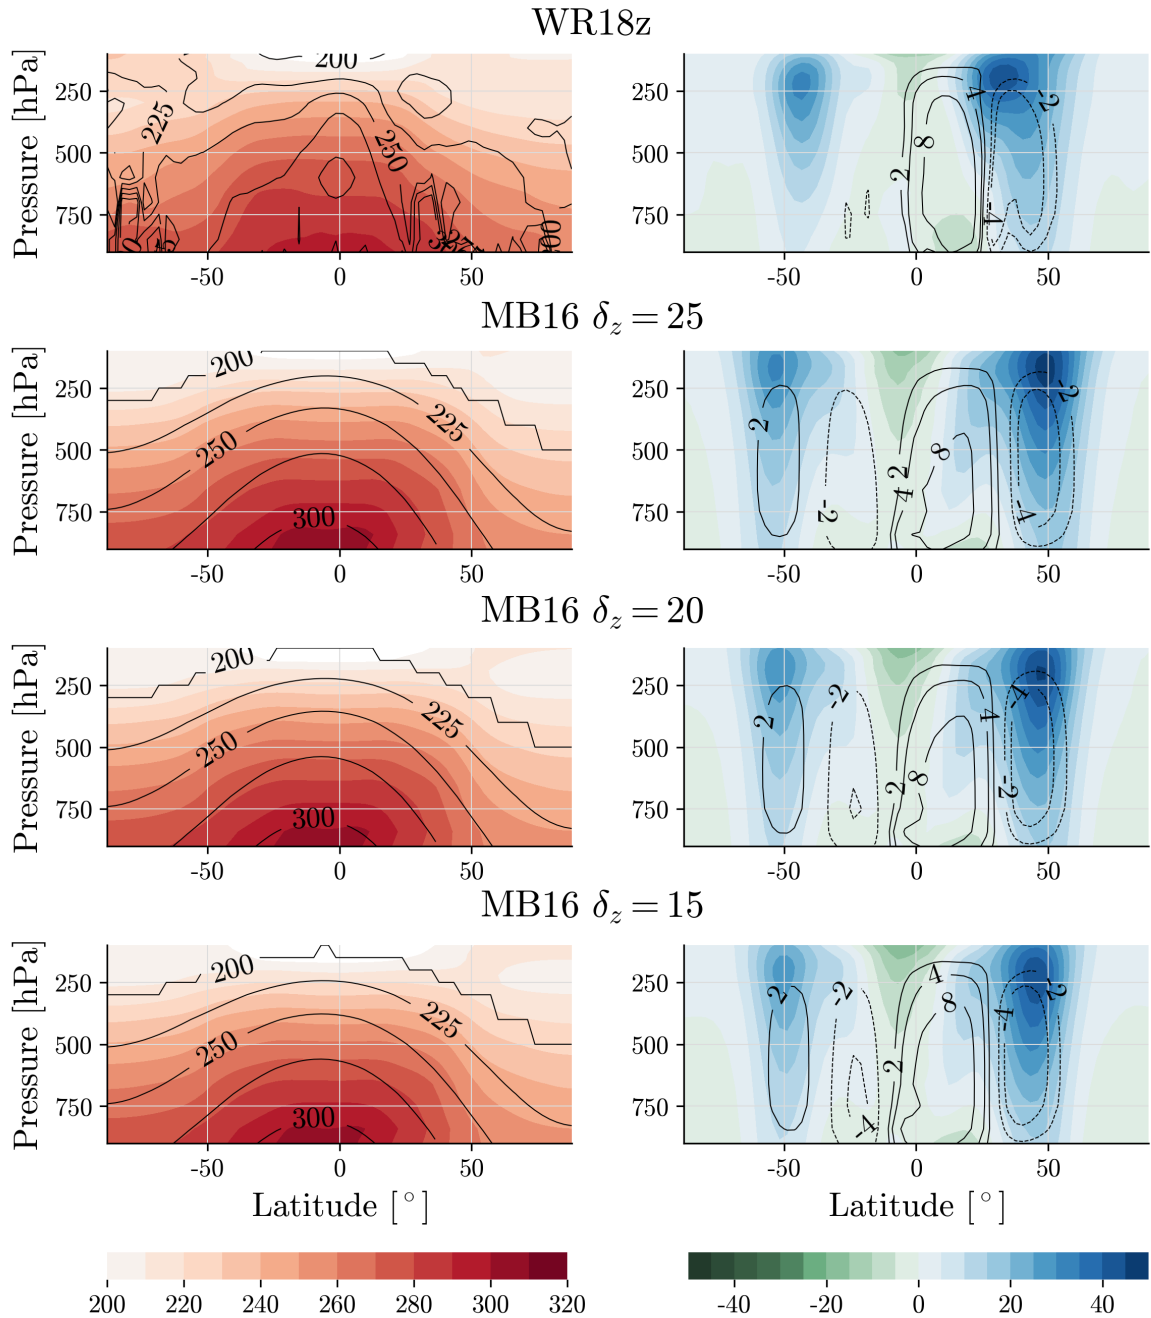

**Figure S1.** DJF zonal-mean equilibrium temperature (left, black contour lines, K) and DJF climatology of the simulated temperature (left, color contours, K), zonal wind (right, color contours,  $\text{ms}^{-1}$ ), and mean meridional circulation (right, black contour lines,  $10^{10} \text{kg s}^{-1}$ ) for WR18z (top), MB16 ( $\delta_z = 25$ ) (middle top), MB16 ( $\delta_z = 20$ ) (middle bottom), and MB16 ( $\delta_z = 15$ ) (bottom).

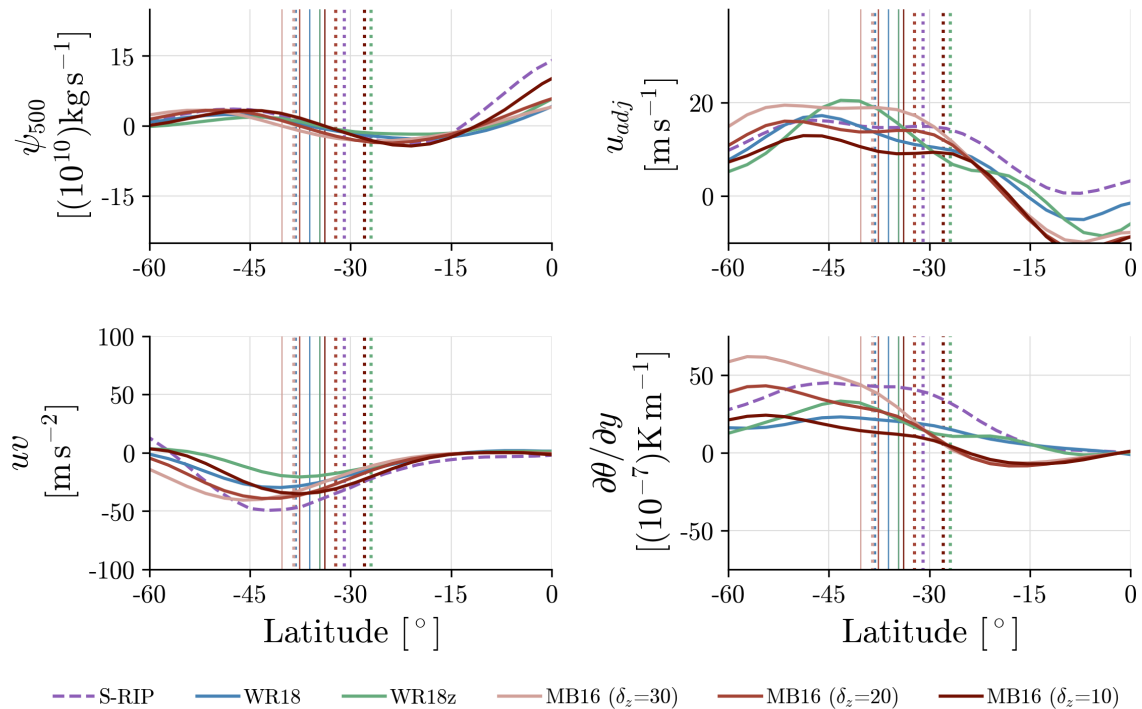

**Figure S2.** SH DJF zonal-mean meridional streamfunction at 500 hPa (top left), adjusted wind (top right), vertically averaged eddy momentum flux between 200-400 hPa (bottom left), and vertically averaged meridional temperature gradient between 100-400 hPa (bottom right) for S-RIP, WR18, WR18z, MB16 (default,  $\delta_z = 10$ ), MB16 ( $\delta_z = 20$ ), and MB16 ( $\delta_z = 30$ ). The dotted and solid thin vertical lines show the climatological  $\phi_{STJ}$  and climatological  $\phi_{HC}$ , respectively, for each corresponding simulation.
